# Supplementary material for: Cytokine-mediated changes in K+ channel activity promotes an adaptive Ca2+ response that sustains β-cell insulin secretion during inflammation
Source: PubMed Central journal article supplement (PMC5773563; doi:10.1038/s41598-018-19600-x), 2018-01-18
Supplement: 41598_2018_19600_MOESM1_ESM.pdf [file 41598_2018_19600_MOESM1_ESM.pdf]

1 **SUPPLEMENTARY INFORMATION**

2

3 Cytokine-mediated changes in K<sup>+</sup> channel activity promotes an adaptive Ca<sup>2+</sup> response  
4 that sustains β-cell insulin secretion during inflammation

5

6 Matthew T. Dickerson, Avery M. Bogart, Molly K. Altman, Sarah C. Milian, Kelli L.  
7 Jordan, Prasanna K. Dadi, and David A. Jacobson

8

9 **Table of Contents**

10 1. Average of all whole-cell K<sub>2</sub>P current recordings for WT and TALK-1 KO β-cells.....2  
11 2. Annexin-V-FITC apoptosis assay for WT and TALK-1 KO β-cells.....3  
12 3. Quantification of [Ca<sup>2+</sup>]<sub>i</sub> oscillation amplitudes in WT and TALK-1 KO β-cells.....5  
13 4. Unprocessed human islet TALK-1 western blots.....6

14

15

16

17

18

19

20

21

22

23

24

25 **1. Average of all whole-cell K2P current recordings for WT and TALK-1 KO  $\beta$ -cells**

26 Average K2P current densities were calculated for nontreated WT (N=39 cells)  
27 and TALK-1 KO (N=31 cells)  $\beta$ -cells by averaging all whole-cell K2P voltage-clamp  
28 recordings for voltages between -120 mV and 60 mV (Fig. S1a). WT and TALK-1 KO  
29 K2P currents were compared at selected voltages (-30 mV, 0 mV, 30 mV, and 60 mV;  
30 Fig. S1b) using an unpaired two-tailed t-test. TALK-1 KO K2P current density was lower  
31 than WT K2P current density at 0 mV (WT:  $13.01 \pm 0.48$  pA/pF and TALK-1 KO:  
32  $10.73 \pm 0.49$  pA/pF,  $P < 0.01$ ), 30 mV (WT:  $25.68 \pm 0.99$  pA/pF and TALK-1 KO:  
33  $19.41 \pm 0.74$  pA/pF,  $P < 0.001$ ), and 60 mV (WT:  $40.52 \pm 1.34$  pA/pF and TALK-1 KO:  
34  $29.75 \pm 1.19$  pA/pF,  $P < 0.001$ ).

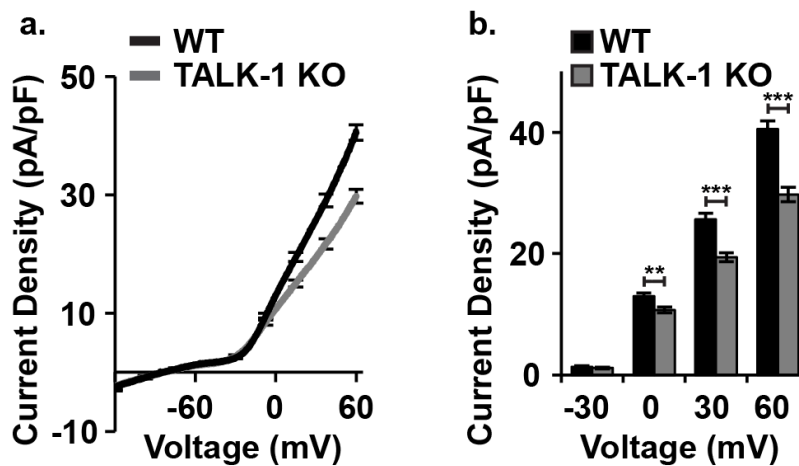

35

36 **Fig. S1: Knockout of TALK-1 decreases  $\beta$ -cell whole-cell K2P currents.** a. Average  
37 K2P current density of WT (N=39 cells) and TALK-1 KO (N=31 cells)  $\beta$ -cells and b.  
38 average K2P currents in WT (black) and TALK-1 KO (gray) mouse  $\beta$ -cells at selected  
39 voltages. Statistical analysis was conducted with unpaired two-tailed t-tests and  
40 uncertainty is expressed as SEM (\*\* $P < 0.01$ , \*\*\* $P < 0.001$ ).

41  
42  
43  
44  
45

## 46 **2. Annexin-V-FITC apoptosis assay for WT and TALK-1 KO $\beta$ -cells**

47 WT and TALK-1 KO mouse islets were isolated and dispersed into single cells  
48 then cultured in islet media for 24 hrs at 37°C, 5% CO<sub>2</sub>. The islet media was then  
49 replaced with fresh islet media or islet media with cytokines and the islets were cultured  
50 an additional 24 hrs at 37°C, 5% CO<sub>2</sub>. Apoptotic cells were visualized using an  
51 ApoScreen® Annexin V Apoptosis Kit-FITC (SouthernBiotech) as per manufacturer's  
52 instructions. Cell nuclei were stained with Hoechst 33342 (Tocris Bioscience) and used  
53 to determine total cell number per field. Fluorescence was imaged using a Nikon  
54 Eclipse TE2000-U microscope equipped with an epifluorescence illuminator (Sutter  
55 Instrument Company), a CCD camera (HQ2; Photometrics, Inc), and Nikon Elements  
56 software (Nikon, Inc). Data analysis was performed using the ImageJ Fiji image  
57 processing pack.

58 Because [Ca<sup>2+</sup>]<sub>ER</sub> handling is an important factor in apoptotic signaling we  
59 investigated the involvement of TALK-1 expression in cytokine-induced  $\beta$ -cell apoptosis  
60 (Fig. S2). In the absence of cytokines TALK-1 expression had no effect on  $\beta$ -cell  
61 apoptosis (WT nontreated: 22.1±1.1% apoptotic and TALK-1 KO nontreated: 23.8±1.3%  
62 apoptotic, Fig. S2). Cytokine exposure led to a significant increase in apoptosis for WT  
63 and TALK-1 KO  $\beta$ -cells (WT cytokines: 29.7±1.6% apoptotic, P<0.05, and 33.9±1.2%  
64 apoptotic, P<0.001). However, this increase in apoptosis was indistinguishable for WT  
65 and TALK-1 KO  $\beta$ -cells indicating that this rise is not due to changes in TALK-1  
66 expression.

67

68

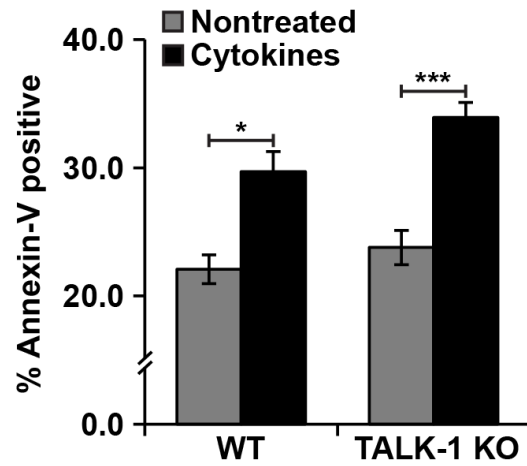

70

71 **Fig. S2: Cytokine exposure triggers  $\beta$ -cells apoptosis in a TALK-1 independent**  
72 **manner.** Percent apoptotic cells calculated as number of annexin-V-FITC positive cells  
73 divided by total number of cells (identified by Hoechst 33342 nuclear staining). Average  
74 % apoptotic cells for nontreated (gray) and cytokine treated (black) WT (N=3 animals)  
75 and TALK-1 KO (N $\geq$ 3 animals)  $\beta$ -cells. Statistical analysis was conducted with a 1-way  
76 ANOVA and uncertainty is expressed as SEM (\*\*P<0.01, \*\*\*P<0.001).

77

78

79

80

81

82

83

84

85

86

87

88

89

90 **3. Quantification of [Ca<sup>2+</sup>]<sub>i</sub> oscillation amplitudes in WT and TALK-1 KO β-cells**

91 Because the amplitude of islet [Ca<sup>2+</sup>]<sub>i</sub> oscillations during 2<sup>nd</sup> phase GSCI are  
92 greatly reduced after exposure to cytokines, the magnitude of this decrease was  
93 quantified. Whole islet Fura-2 AM [Ca<sup>2+</sup>]<sub>i</sub> recordings (from Fig. 2) were examined and all  
94 islets exhibiting [Ca<sup>2+</sup>]<sub>i</sub> oscillations for a period of at least 5 min were included in this  
95 analysis. A 5 min oscillatory period was selected for each recording and the amplitude  
96 of [Ca<sup>2+</sup>]<sub>i</sub> oscillations was estimated as  $F_{340/380, \max} - F_{340/380, \min}$  (Fig. S3a). The [Ca<sup>2+</sup>]<sub>i</sub>  
97 oscillation amplitude of nontreated WT and TALK-1 KO islets were indistinguishable  
98 (WT:  $0.285 \pm 0.022 \Delta F_{340/380}$  and TALK-1 KO:  $0.387 \pm 0.031 \Delta F_{340/380}$ ) After cytokine  
99 exposure [Ca<sup>2+</sup>]<sub>i</sub> oscillation amplitude decreased in magnitude ( $P < 0.001$ ) similarly in WT  
100 and TALK-1 KO islets (WT:  $0.119 \pm 0.011 \Delta F_{340/380}$  and TALK-1 KO:  $0.130 \pm 0.013$   
101  $\Delta F_{340/380}$ ). These results suggest that the cytokine-mediated decrease in islet [Ca<sup>2+</sup>]<sub>i</sub>  
102 oscillation amplitude is not related to TALK-1 expression.

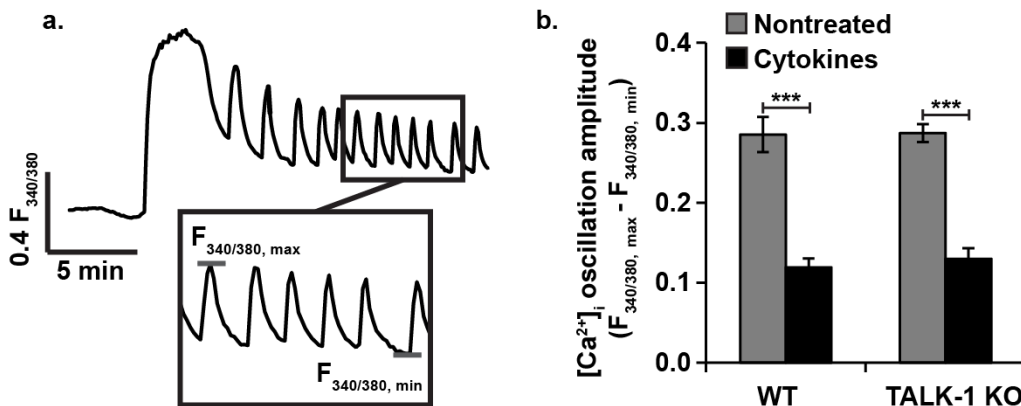

103 **Fig. S3: Cytokine exposure decreased islet [Ca<sup>2+</sup>]<sub>i</sub> oscillation amplitude**  
104 **independently of TALK-1 expression.** a. Overview of approach used to quantify  
105 average islet [Ca<sup>2+</sup>]<sub>i</sub> oscillation amplitude and b. average [Ca<sup>2+</sup>]<sub>i</sub> oscillation amplitudes  
106 for nontreated (gray) and cytokine treated (black) WT (N≥41 islets) and TALK-1 KO  
107 (N≥23 islets). Statistical analysis was conducted with a 1-way ANOVA and uncertainty  
108 is expressed as SEM (\*\*P<0.001).

109  
110

111 **4. Unmodified human islet TALK-1 western blots**

112

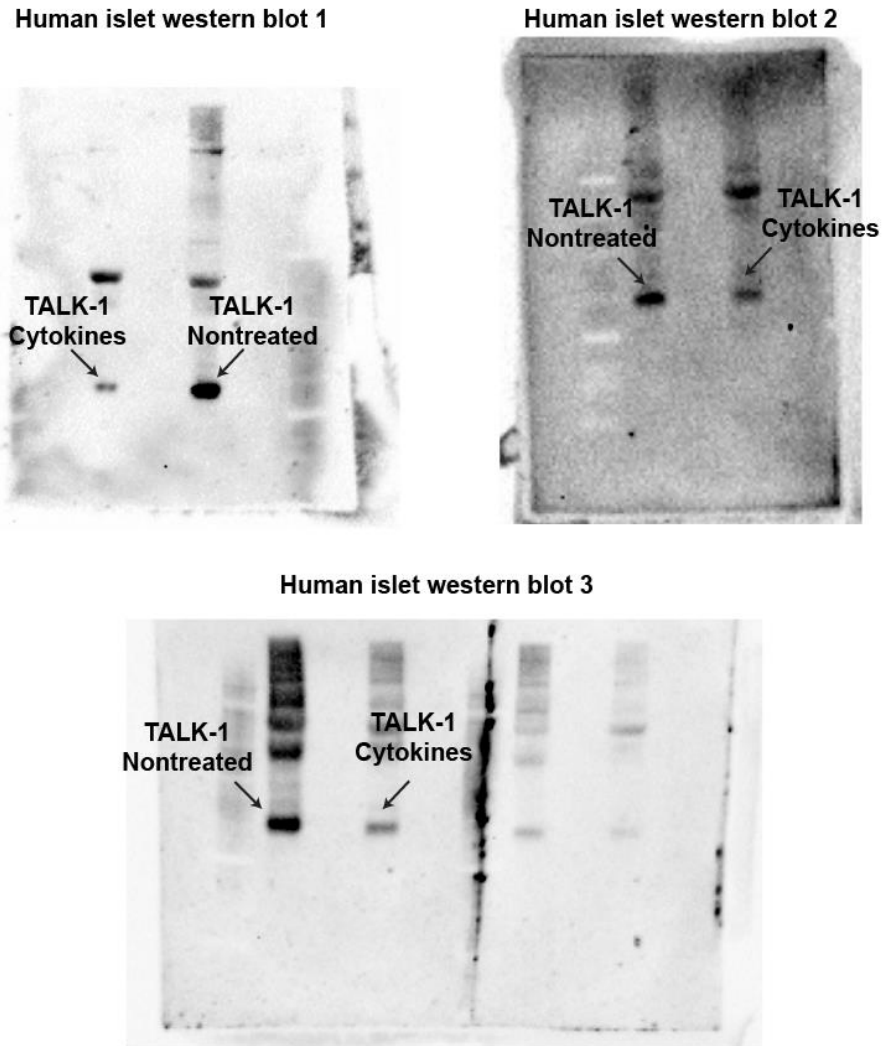

113

114 **Fig S4: Cytokine exposure reduces TALK-1 protein expression in human islets.**

115 Unmodified western blots for TALK-1 protein from human islets quantified in Fig. 1c. For  
116 each western blot 40 mg total protein/lane loaded (as calculated by BCA assay).
